# Supplementary material for: Expansion of vomeronasal receptor genes (OlfC) in the evolution of fright reaction in Ostariophysan fishes
Source: PubMed Central journal article supplement (PMC6588630; doi:10.1038/s42003-019-0479-2), 2019-06-21
Supplement: 42003_2019_479_MOESM2_ESM.pdf [file 42003_2019_479_MOESM2_ESM.pdf]

Supplementary Information for

**Expansion of vomeronasal receptor genes (*OlfC*) in the evolution of  
fright reaction in Ostariophysan fishes**

**Table of contents**

Supplementary Figures

Supplementary Tables

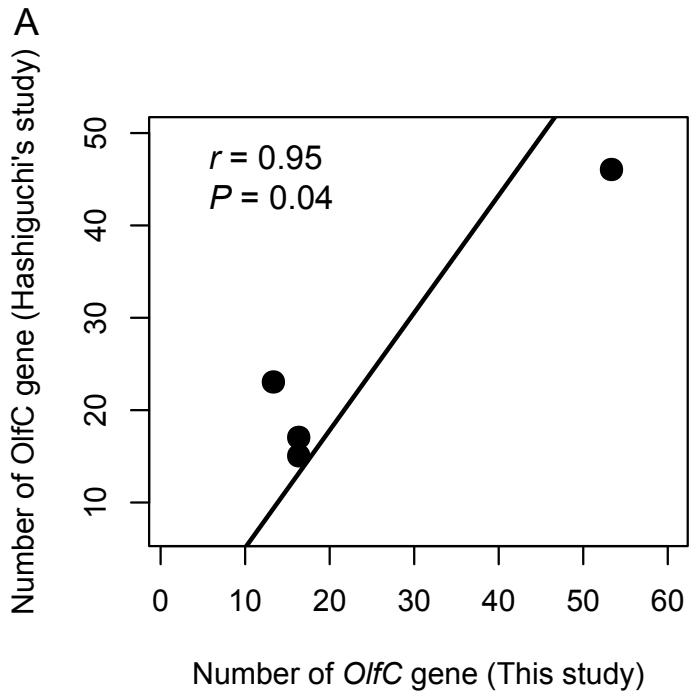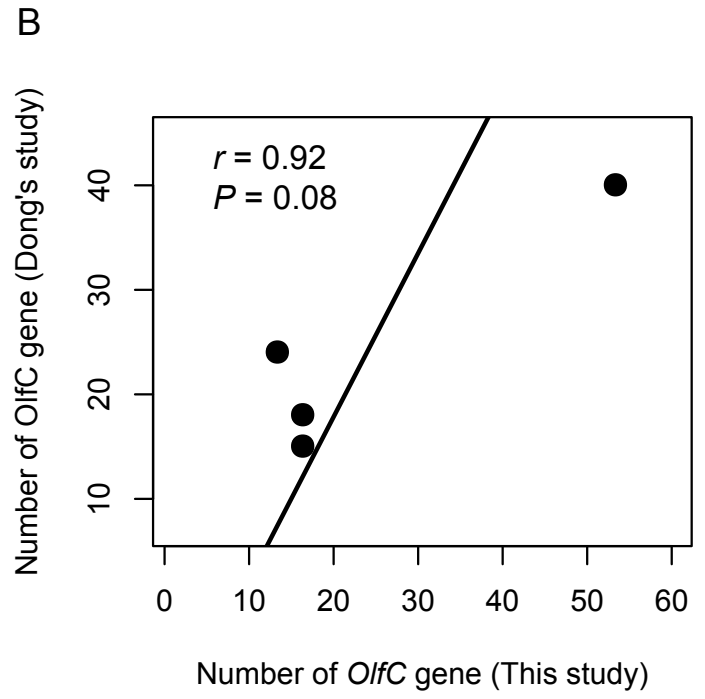

**Supplementary Figure 1 | Comparison of *OlfC* gene counts between our study with previous reports.**

**Family number higher than 2 genes (3932)**

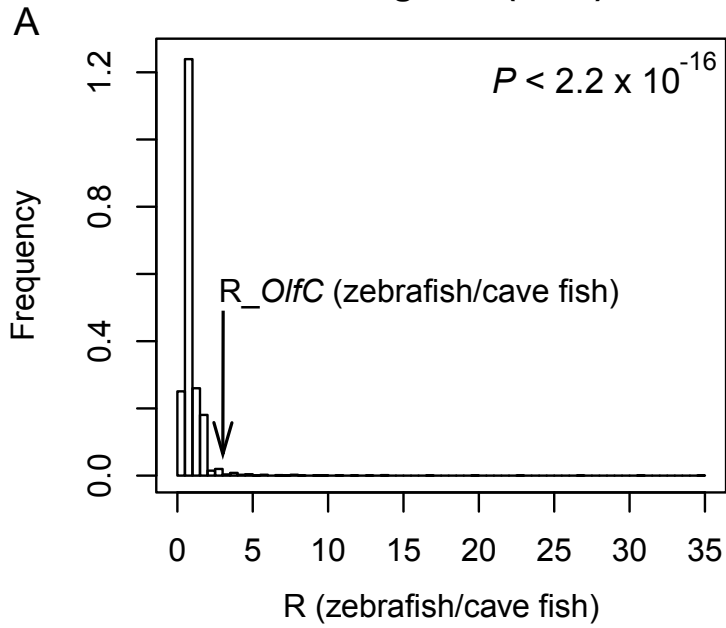

**Family number higher than 5 genes (1295)**

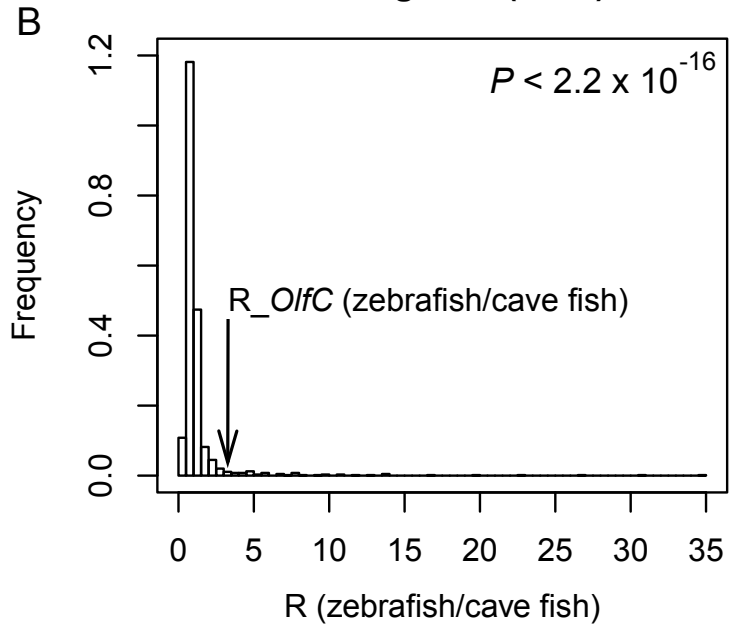

**Family number higher than 10 genes (513)**

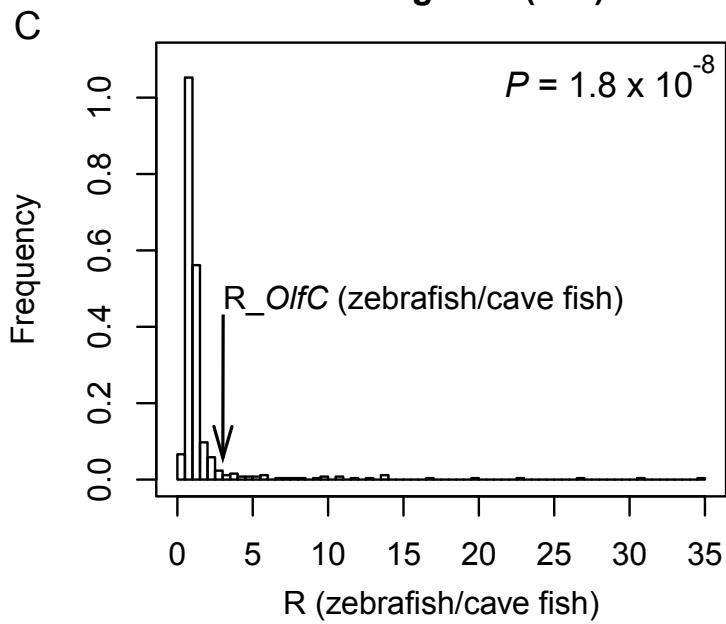

**Family number higher than 15 genes (284)**

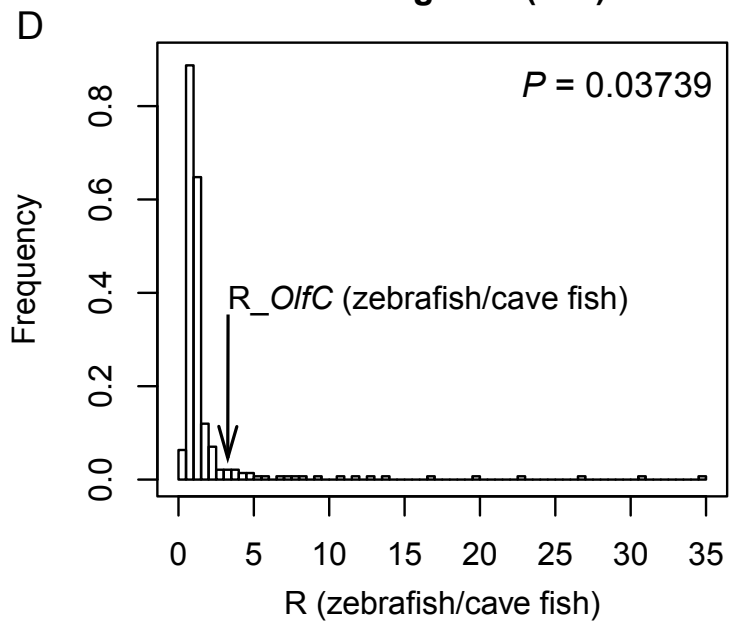

**Supplementary Figure 2 | Frequency distribution of the ratio (R) between zebrafish and cave fish for the relative size of gene families from their genomes. Arrow shows the R value for *OlfC* gene.**

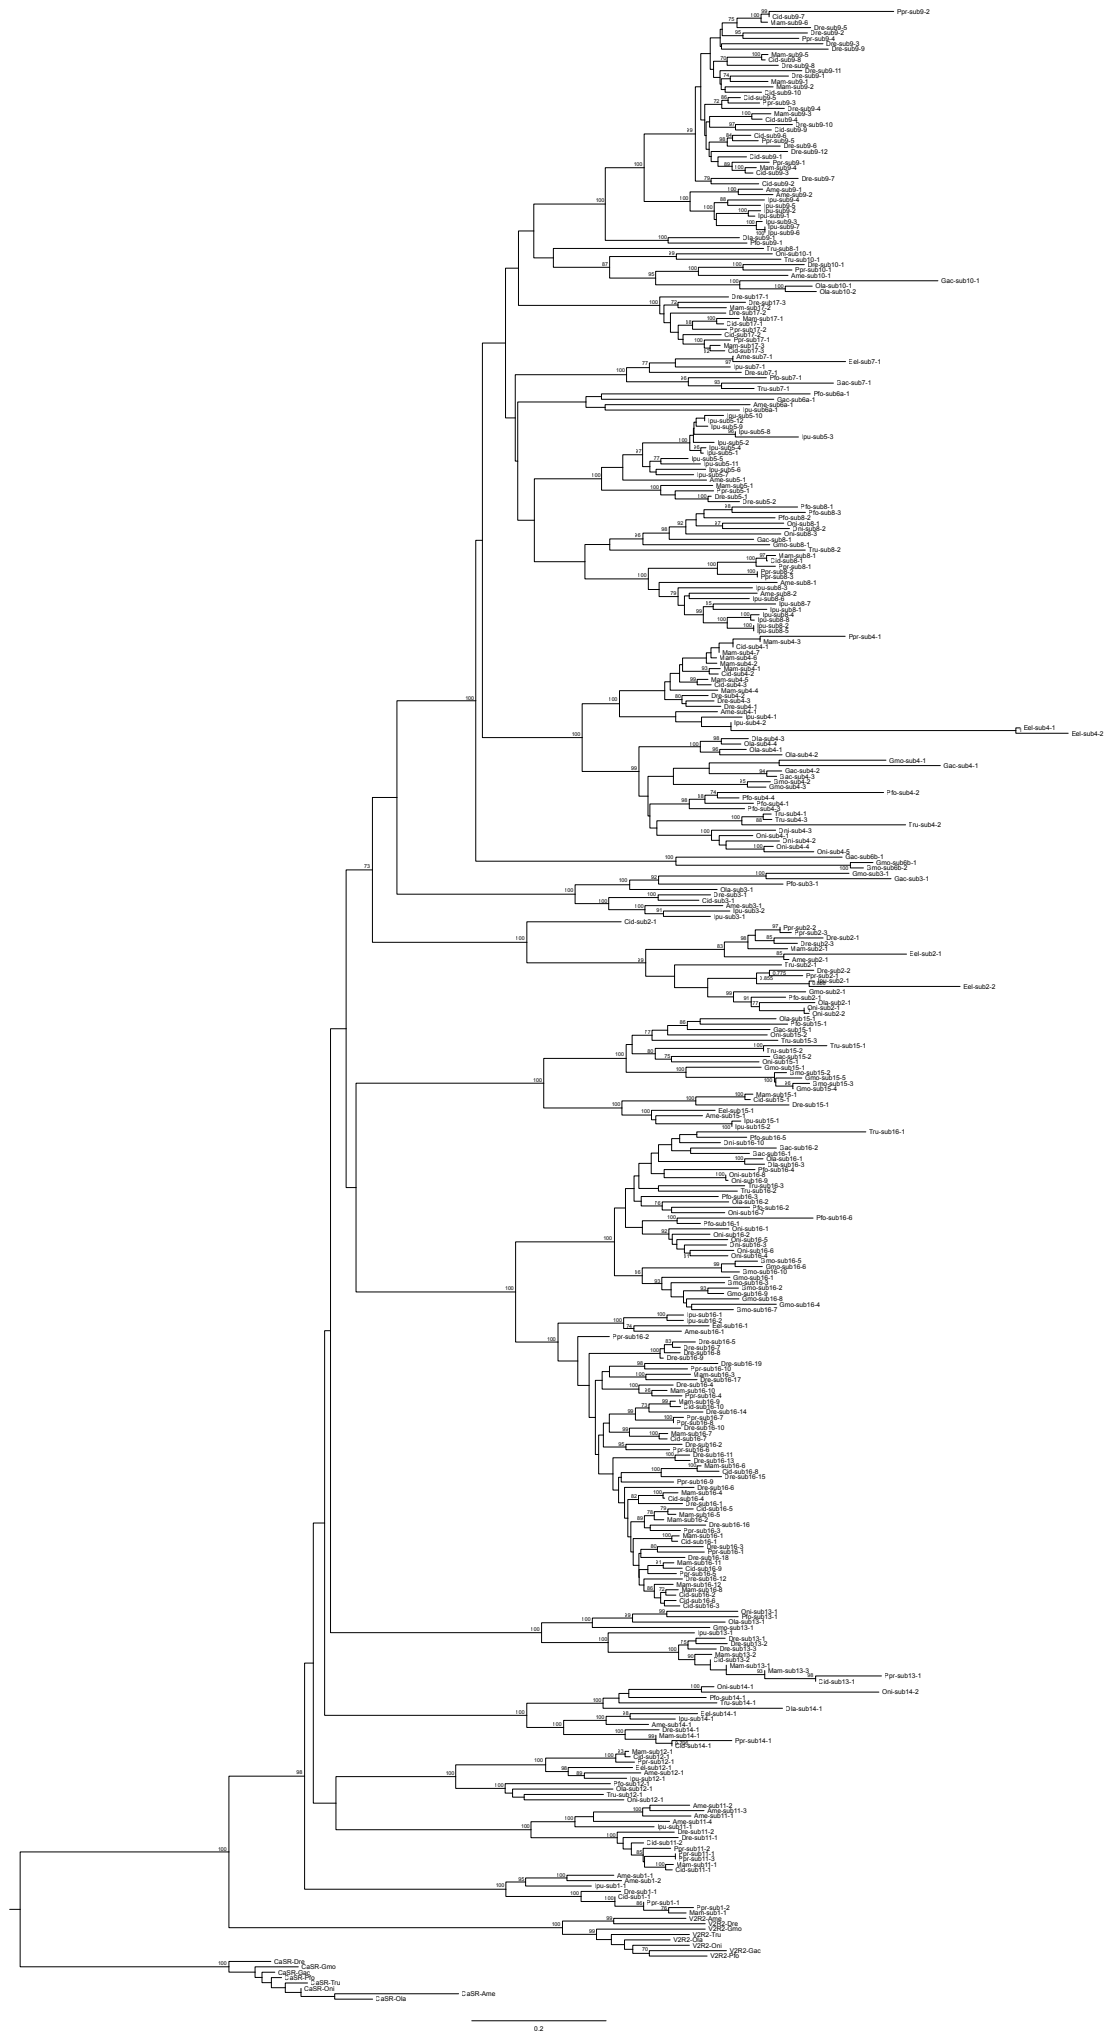

**Supplementary Figure 3 | The Neighbor-Joining (NJ) phylogenetic tree with detailed species and gene names. Bootstraps were shown. Bootstrap values higher than 70 were shown.**

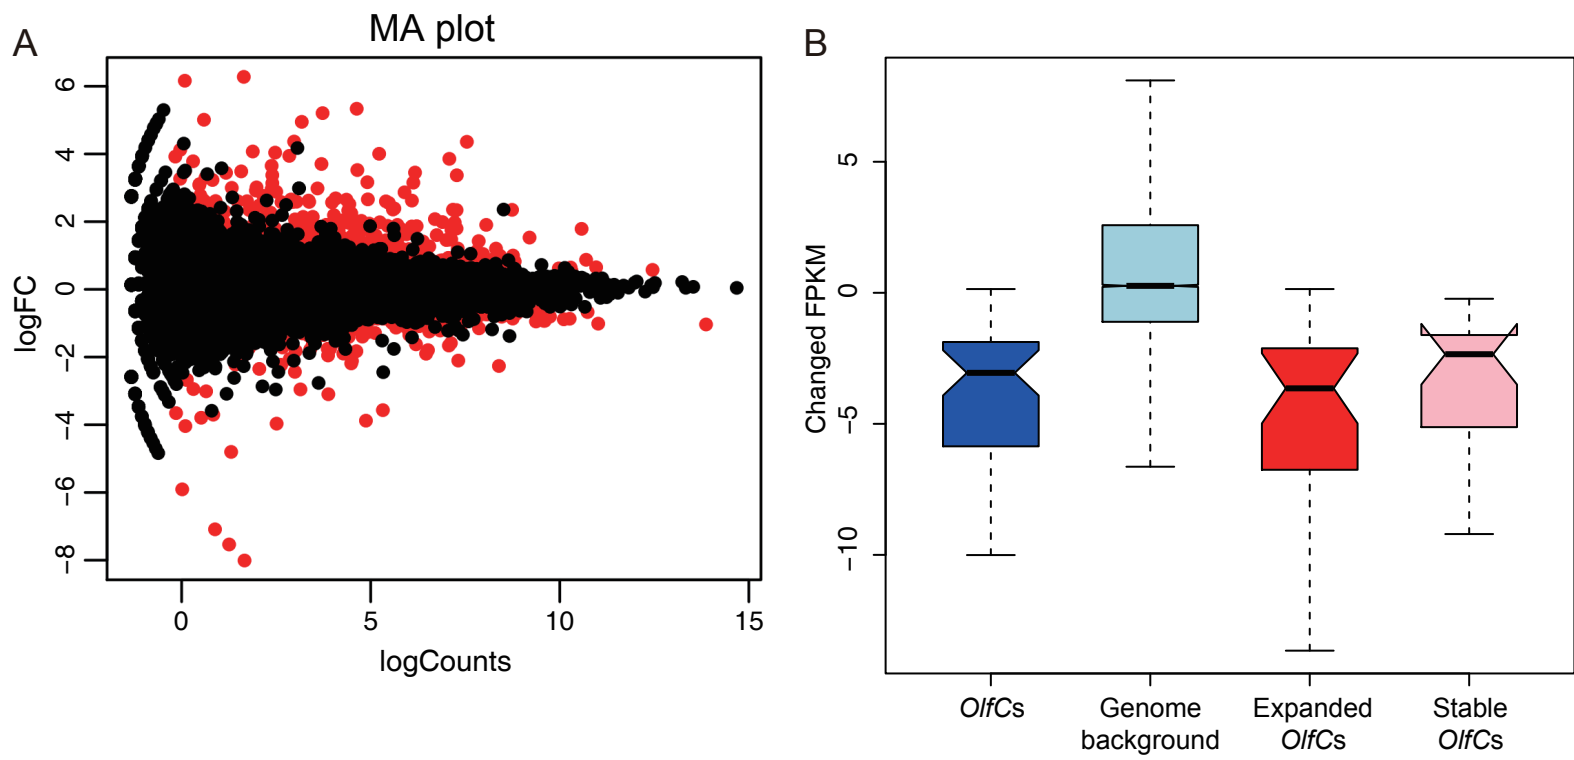

**Supplementary Figure 4 | Expression analyses between test and control groups of zebrafish after fright reaction. (A) The MA plot of all genes in zebrafish between test and control groups with red color for differentially expressed genes. (B) Change of expression levels before and after fright reaction.**



**Supplementary Table 1 | Comparison of *OlfC* gene counts between our study with previous reports.**

| Species     | Number of <i>OlfC</i> gene<br>(This study) | Number of <i>OlfC</i> gene<br>(Hashiguchi's study) <sup>1</sup> | Number of <i>OlfC</i> gene<br>(Dong's study) <sup>2</sup> |
|-------------|--------------------------------------------|-----------------------------------------------------------------|-----------------------------------------------------------|
| Zebrafish   | 53                                         | 46                                                              | 40                                                        |
| Medaka      | 16                                         | 17                                                              | 15                                                        |
| Stickleback | 13                                         | 23                                                              | 24                                                        |
| Fugu        | 16                                         | 15                                                              | 18                                                        |

**Supplementary Table 2 | Potential gene conversion events between Channel catfish *OlfC* subfamily 9 genes.**

| Sequence pair             | P value | BC KA P value | Fragment length |
|---------------------------|---------|---------------|-----------------|
| Ipu_sub9_1 and Ipu_sub9_5 | 0.0002  | 0.00119       | 136 aa          |
| Ipu_sub9_4 and Ipu_sub9_5 | 0.0003  | 0.00212       | 186 aa          |



**Supplementary Table 3 | Summary of the RNA-seq datasets in zebrafish olfactory mucosae transcriptome before and after fright reaction.**

| Tissue            | Sample accession | SRA accession | Status    | Read number | % Mapped |
|-------------------|------------------|---------------|-----------|-------------|----------|
| olfactory mucosae | OE_c1            | SRR7549094    | Control 1 | 26,055,310  | 67.6     |
| olfactory mucosae | OE_c2            | SRR7549095    | Control 2 | 22,776,726  | 66.2     |
| olfactory mucosae | OE_c3            | SRR7549096    | Control 3 | 22,428,587  | 67.7     |
| olfactory mucosae | OE_t1            | SRR7549097    | Test 1    | 25,131,021  | 70.6     |
| olfactory mucosae | OE_t2            | SRR7549092    | Test 2    | 21,307,584  | 64.7     |
| olfactory mucosae | OE_t3            | SRR7549093    | Test 3    | 26,578,173  | 67.0     |

## References

- 1 Hashiguchi, Y., Furuta, Y. & Nishida, M. Evolutionary patterns and selective pressures of odorant/pheromone receptor gene families in teleost fishes. *Plos One* **3**, e4083, doi:10.1371/journal.pone.0004083 (2008).
- 2 Dong, D., Jin, K., Wu, X. & Zhong, Y. CRDB: database of chemosensory receptor gene families in vertebrate. *Plos One* **7**, e31540, doi:10.1371/journal.pone.0031540 (2012).
